# Supplementary material for: Embedding monomers and dimers of sulfonamide antibiotics into high silica zeolite Y: an experimental and computational study of the tautomeric forms involved
Source: Royal Society of Chemistry journal article supplement (doi:10.1039/c3ra22290j), 2013-01-01

1 **Figure 1S.** Thermogravimetry (left) and derivative thermogravimetry (right) in dry air atmosphere  
2 of sulfathiazole (ST), sulfapyridine (SP), sulfamerazine (SMZ), sulfadimethoxine (SDM), and  
3 sulfadoxine (SDX) pure and adsorbed into zeolite HSZ-Y at maximal adsorption capacity. The  
4 values reported are referred to the weight loss from 200 to 800 °C.

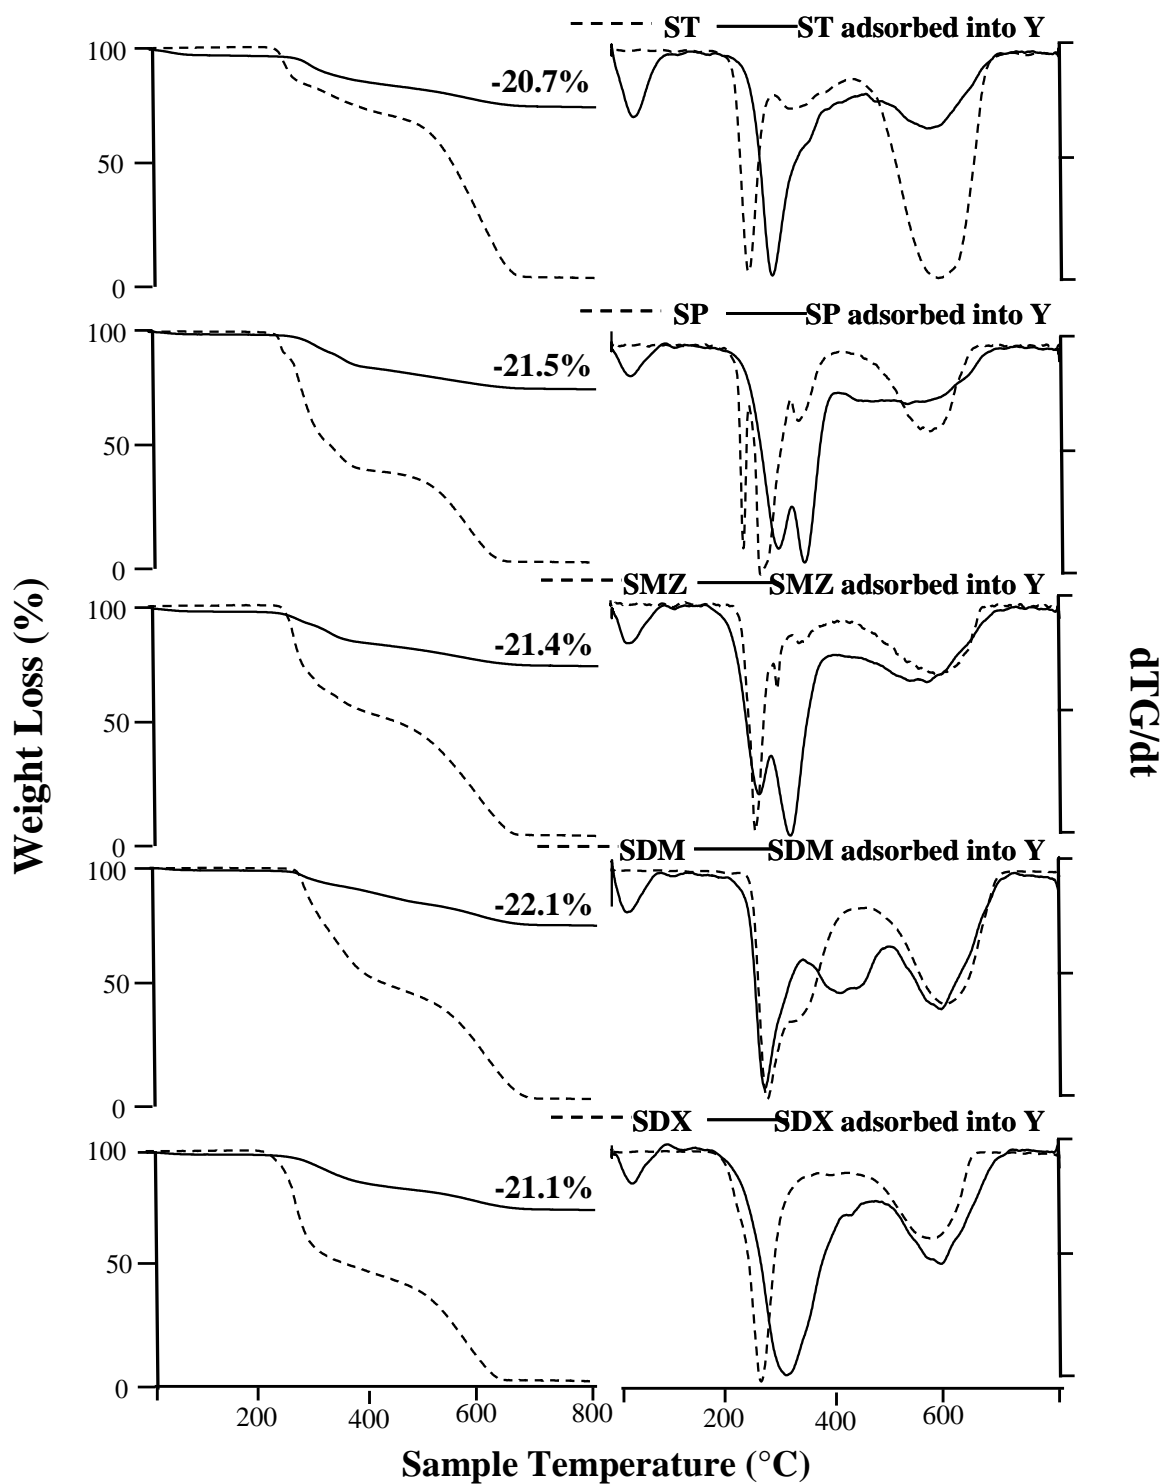

Supplement: c3ra22290j.pdf [file c3ra22290j.pdf]
