# Supplementary material for: Embedding monomers and dimers of sulfonamide antibiotics into high silica zeolite Y: an experimental and computational study of the tautomeric forms involved
Source: Royal Society of Chemistry journal article supplement (doi:10.1039/c3ra22290j), 2013-01-01
Supplement: c3ra22290j_2.pdf [file c3ra22290j_2.pdf]

1 **Supplementary Material**  
2 **Calculation of NMR chemical shifts**

3  
4 Chemical shieldings were computed for sulfathiazole (ST), sulfapyridine (SP), sulfamerazine  
5 (SMZ), sulfadimethoxine (SDM) and sulfadoxine (SDX) in monomer and dimer forms; according  
6 to the results discussed in the text, ST was considered in its imidic tautomeric form (with the  
7 heterocycle N atom protonated), while all the other drugs were considered in the amidic structure  
8 (characterized by the SO<sub>2</sub>-NH moiety).

9 All the structures were optimized at the B3LYP/6-31G(d,p) level; NMR parameters were computed  
10 with the GIAO method using larger basis sets, namely 6-311+G(d,p) (hereafter BS1) and aug-cc-  
11 PVTZ (BS2), to verify the stability of the computed values; no environmental effects were included  
12 in the calculations. The calculations on dimers with the largest basis set raised convergency  
13 problems due to the huge computational weight, so that only BS1 results are reported for dimers:  
14 then in the text we shall refer to more accurate BS2 values for monomer drugs, and approximate the  
15 monomer-dimer differences at the BS1 level.

16 Conventional chemical shifts ( $\delta$ , ppm) were obtained by subtracting the chemical shieldings ( $\sigma$ ,  
17 ppm) of the various nuclei in sulfadugs from the  $\sigma$  values computed at the same level for  
18 tetramethylsilane (TMS) for <sup>1</sup>H and <sup>13</sup>C, and ammonia for <sup>15</sup>N.

19 The isotropic chemical shifts for <sup>1</sup>H, <sup>13</sup>C and <sup>15</sup>N are reported in tables S1, S2 and S3, respectively:  
20 the atom numbering is referred to figures S1 to S5. For <sup>15</sup>N only the atoms directly bound to  
21 hydrogen are reported since they are detected by the experiments.

22

23

---

- 1 Table S1. Computed <sup>1</sup>H isotropic chemical shifts (referred to TMS, ♦ = 31.9 ppm with BS1, 31.6  
 2 ppm with BS2). Refer to figures S1-S5 for the atom numbering.

| ST                 |      |       | SP      |                    |       |         | SMZ  |                    |     |     |      |
|--------------------|------|-------|---------|--------------------|-------|---------|------|--------------------|-----|-----|------|
| monomer            |      | dimer | monomer |                    | dimer | monomer |      | dimer              |     |     |      |
| BS1                | BS2  | BS1   | BS1     | BS2                | BS1   | BS1     | BS2  | BS1                |     |     |      |
| 7H                 | 6.6  | 6.5   | 6.9     | 7H                 | 6.8   | 6.7     | 7.0  | 7H                 | 6.6 | 6.5 | 6.4  |
| 8H                 | 7.4  | 7.8   | 7.1     | 8H                 | 7.4   | 8.2     | 8.0  | 8H                 | 8.4 | 8.5 | 8.5  |
| 9H                 | 8.2  | 8.1   | 7.0     | 9H                 | 7.5   | 7.9     | 7.2  | 9H                 | 7.8 | 8.1 | 7.4  |
| 10H                | 6.9  | 6.9   | 6.1     | 10H                | 6.4   | 6.6     | 5.8  | 10H                | 6.9 | 6.9 | 6.3  |
| 12H                | 3.2  | 3.7   | 3.8     | 12H                | 3.4   | 3.7     | 3.8  | 12H                | 3.8 | 3.6 | 3.5  |
| 13H                | 3.7  | 3.6   | 3.8     | 13H                | 3.4   | 3.6     | 3.8  | 13H                | 3.4 | 3.7 | 3.1  |
| 21H                | 6.4  | 6.6   | 6.8     | 18H <sup>(a)</sup> | 6.2   | 6.8     | 12.7 | 18H <sup>(a)</sup> | 7.2 | 7.2 | 10.7 |
| 22H                | 6.0  | 6.1   | 6.0     | 22H                | 7.9   | 8.1     | 7.4  | 22H                | 8.7 | 8.5 | 9.7  |
| 25H <sup>(a)</sup> | 10.4 | 11.3  | 14.2    | 24H                | 7.5   | 7.8     | 8.0  | 24H                | 6.6 | 6.7 | 6.8  |
|                    |      |       |         | 26H                | 6.9   | 7.0     | 7.5  | 28H                | 1.8 | 2.2 | 1.7  |
|                    |      |       |         | 28H                | 8.3   | 8.4     | 9.4  | 29H                | 2.5 | 2.4 | 3.5  |
|                    |      |       |         |                    |       |         |      | 30H                | 2.5 | 2.5 | 2.1  |

- 3 (a) this atom involved in H-bonding in dimers.

4

- 5 Table S1 (continued).

| SDM                |     |       | SDX     |                    |       |     |      |
|--------------------|-----|-------|---------|--------------------|-------|-----|------|
| monomer            |     | Dimer | monomer |                    | dimer |     |      |
| BS1                | BS2 | BS1   | BS1     | BS2                | BS1   |     |      |
| 7H                 | 6.8 | 6.9   | 6.5     | 7H                 | 6.4   | 6.7 | 6.5  |
| 8H                 | 7.9 | 8.1   | 8.0     | 8H                 | 7.8   | 8.4 | 7.9  |
| 9H                 | 7.5 | 7.9   | 8.7     | 9H                 | 7.8   | 8.1 | 7.7  |
| 10H                | 6.6 | 6.7   | 6.6     | 10H                | 6.6   | 6.7 | 6.4  |
| 12H                | 3.4 | 3.8   | 3.3     | 12H                | 3.7   | 3.7 | 3.9  |
| 13H                | 3.4 | 3.6   | 3.5     | 13H                | 3.6   | 3.7 | 3.6  |
| 18H <sup>(a)</sup> | 6.4 | 6.6   | 9.8     | 18H <sup>(a)</sup> | 6.2   | 7.1 | 12.0 |

|     |     |     |     |     |     |     |     |
|-----|-----|-----|-----|-----|-----|-----|-----|
| 24H | 6.9 | 6.9 | 7.2 | 27H | 3.8 | 3.9 | 3.7 |
| 29H | 3.7 | 3.8 | 3.7 | 28H | 4.0 | 4.0 | 4.2 |
| 30H | 3.9 | 3.9 | 3.9 | 29H | 4.0 | 4.0 | 4.2 |
| 31H | 3.9 | 3.9 | 4.0 | 30H | 8.2 | 8.2 | 9.5 |
| 33H | 3.8 | 3.9 | 3.8 | 33H | 3.5 | 3.8 | 3.9 |
| 34H | 3.7 | 3.7 | 4.4 | 34H | 3.5 | 3.7 | 3.6 |
| 35H | 3.8 | 3.9 | 3.8 | 35H | 3.7 | 4.0 | 3.9 |

1

2

3 Table S2. Computed  $^{13}\text{C}$  isotropic chemical shifts (referred to TMS,  $\diamond = 183.7$  ppm with BS1, 183.4  
 4 ppm with BS2). Refer to figures S1-S5 for the atom numbering.

| ST      |       |       | SP      |     |       | SMZ     |       |       |       |       |       |
|---------|-------|-------|---------|-----|-------|---------|-------|-------|-------|-------|-------|
| monomer |       | dimer | monomer |     | dimer | monomer |       | dimer |       |       |       |
| BS1     | BS2   | BS1   | BS1     | BS2 | BS1   | BS1     | BS2   | BS1   |       |       |       |
| 1C      | 116.3 | 129.8 | 121.5   | 1C  | 115.2 | 135.3   | 113.8 | 1C    | 115.3 | 118.8 | 116.6 |
| 2C      | 134.7 | 160.2 | 136.6   | 2C  | 138.4 | 142.3   | 137.1 | 2C    | 141.2 | 152.7 | 145.0 |
| 3C      | 142.2 | 155.4 | 145.6   | 3C  | 139.4 | 129.7   | 147.9 | 3C    | 140.9 | 150.2 | 152.8 |
| 4C      | 135.8 | 127.5 | 132.6   | 4C  | 136.6 | 122.3   | 138.8 | 4C    | 136.1 | 138.4 | 136.2 |
| 5C      | 117.6 | 90.4  | 118.4   | 5C  | 119.0 | 123.9   | 112.9 | 5C    | 117.3 | 93.6  | 116.1 |
| 6C      | 161.1 | 148.3 | 159.8   | 6C  | 156.6 | 168.2   | 169.5 | 6C    | 160.6 | 153.1 | 157.6 |
| 18C     | 175.9 | 177.7 | 178.0   | 19C | 159.3 | 159.1   | 163.5 | 19C   | 167.6 | 165.9 | 169.3 |
| 19C     | 125.7 | 127.5 | 129.8   | 20C | 115.8 | 124.2   | 117.0 | 20C   | 166.7 | 158.6 | 167.4 |
| 20C     | 114.0 | 112.6 | 118.0   | 21C | 143.8 | 141.1   | 144.6 | 21C   | 117.7 | 117.5 | 118.5 |
|         |       |       |         | 23C | 124.1 | 122.8   | 124.6 | 25C   | 177.6 | 172.0 | 178.5 |
|         |       |       |         | 27C | 156.1 | 161.1   | 157.2 | 27C   | 25.9  | 26.0  | 25.1  |

5

6 Table S2 (continued).

| SDM     |     |       | SDX     |     |       |
|---------|-----|-------|---------|-----|-------|
| monomer |     | dimer | monomer |     | dimer |
| BS1     | BS2 | BS1   | BS1     | BS2 | BS1   |
|         |     |       |         |     |       |

|     |       |       |       |     |       |       |       |
|-----|-------|-------|-------|-----|-------|-------|-------|
| 1C  | 115.3 | 132.4 | 114.6 | 1C  | 116.8 | 117.1 | 116.4 |
| 2C  | 136.4 | 137.5 | 133.4 | 2C  | 139.7 | 147.4 | 142.3 |
| 3C  | 141.9 | 126.7 | 145.7 | 3C  | 137.1 | 147.8 | 146.3 |
| 4C  | 135.5 | 122.0 | 137.8 | 4C  | 136.7 | 143.4 | 136.5 |
| 5C  | 118.2 | 124.3 | 119.2 | 5C  | 119.1 | 112.2 | 117.5 |
| 6C  | 157.1 | 169.3 | 156.5 | 6C  | 156.7 | 152.0 | 160.0 |
| 19C | 167.5 | 157.3 | 171.6 | 19C | 160.1 | 152.9 | 161.8 |
| 20C | 179.6 | 172.0 | 180.6 | 20C | 173.7 | 169.4 | 172.7 |
| 22C | 172.1 | 176.9 | 172.4 | 22C | 159.5 | 158.9 | 161.5 |
| 23C | 88.2  | 98.6  | 92.4  | 23C | 135.1 | 132.3 | 134.4 |
| 28C | 55.9  | 56.1  | 54.4  | 26C | 56.1  | 59.6  | 54.1  |
| 32C | 55.7  | 57.2  | 55.7  | 32C | 61.6  | 61.0  | 61.8  |

1

2

3 Table S3. Computed  $^{15}\text{N}$  isotropic chemical shifts (referred to  $\text{NH}_3$ ,  $\diamond = 258.7$  ppm with BS1, 259.8  
 4 ppm with BS2).

|                   | ST      |       | SP    |       |         | SMZ   |       |         | SDM   |       |         | SDX   |       |       |       |
|-------------------|---------|-------|-------|-------|---------|-------|-------|---------|-------|-------|---------|-------|-------|-------|-------|
|                   | monomer |       | dimer |       | monomer | dimer |       | monomer | dimer |       | monomer | dimer |       |       |       |
|                   | BS1     | BS2   | BS1   | BS1   | BS2     | BS1   | BS1   | BS2     | BS1   | BS1   | BS2     | BS1   | BS1   | BS2   | BS1   |
| $\text{NH}_2$     | 85.8    | 75.1  | 86.8  | 71.5  | 77.5    | 87.6  | 83.4  | 76.9    | 80.6  | 73.6  | 79.5    | 72.4  | 71.0  | 73.8  | 82.3  |
| $\text{NH}^{(a)}$ | 162.5   | 163.4 | 184.0 | 178.6 | 178.6   | 174.7 | 179.8 | 175.6   | 185.7 | 180.0 | 176.8   | 179.6 | 186.1 | 181.1 | 185.8 |

5 (a) heterocycle N atom in ST (in imidic tautomeric form); amidic  $\text{SO}_2\text{-NH}$  atom in all the other  
 6 drugs.

7

8

1 Figure S2. Sulfathiazole atom numbering.

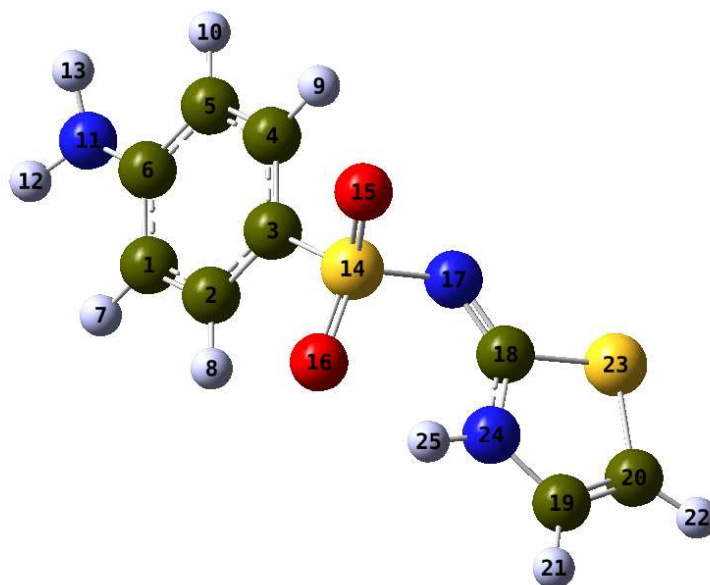

2

3

4 Figure S3. Sulfapyridine atom numbering.

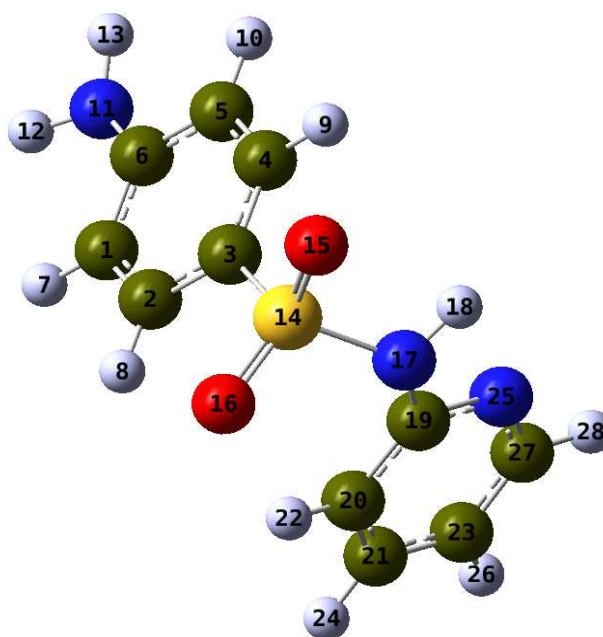

5

6

7

8

1 Figure S4. Sulfamerazine atom numbering.

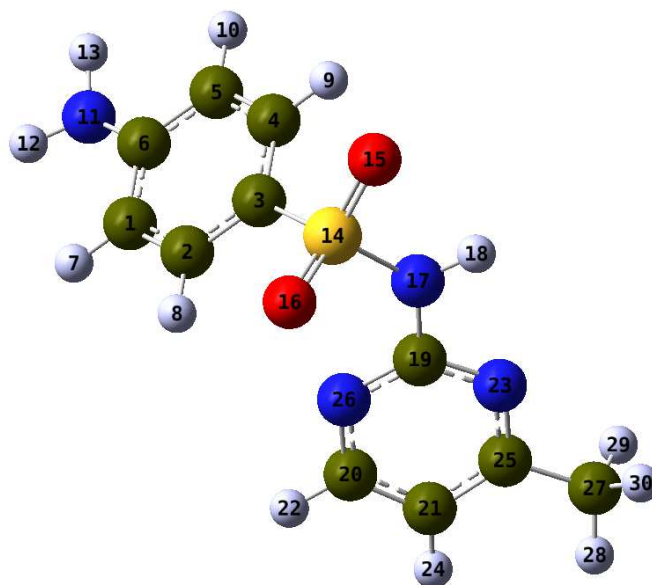

2

3

4 Figure S5. Sulfadimethoxine atom numbering.

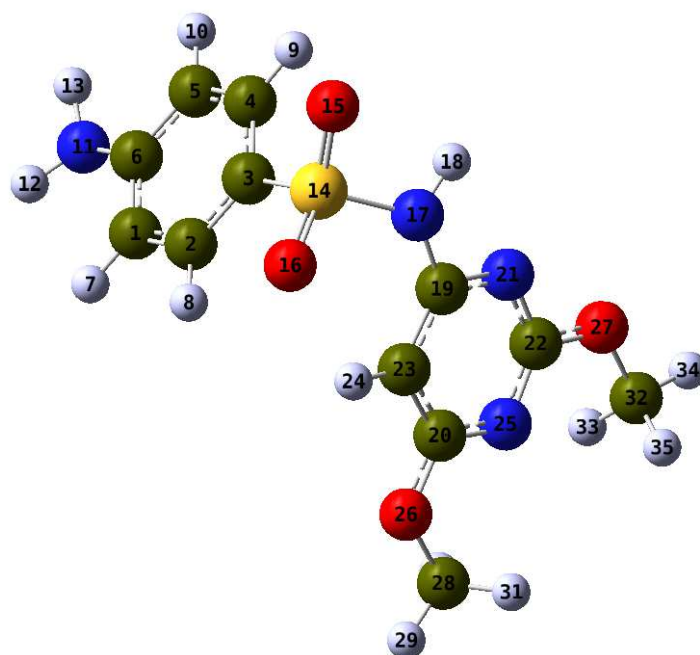

5

6

7

8

1 Figure S6. Sulfadoxine atom numbering.

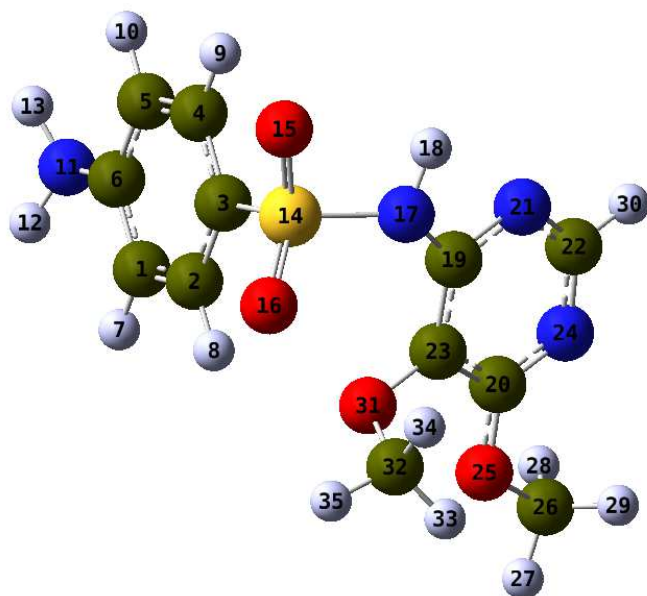

2

3
